# Supplementary material
Source: Springer Nature journal article supplement (https://www.springermedizin.de/resource/supplementary/12990_2009_258_MOESM3_ESM.pdf/9612902)

## Vi/Vc

### A. Ipsilateral

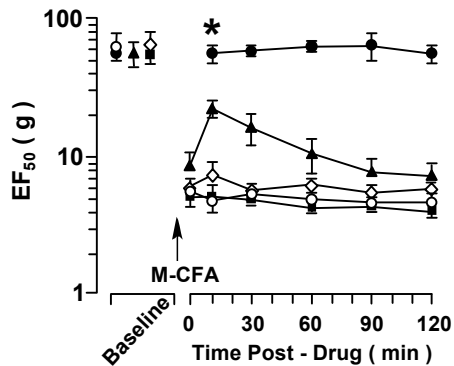

## Vc

### C. Ipsilateral

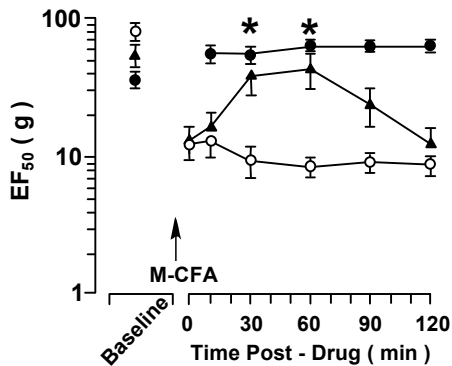

### B. Contralateral

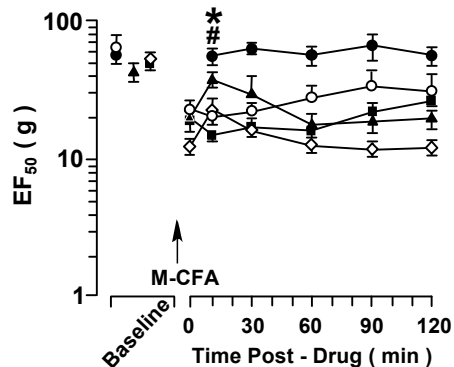

### D. Contralateral

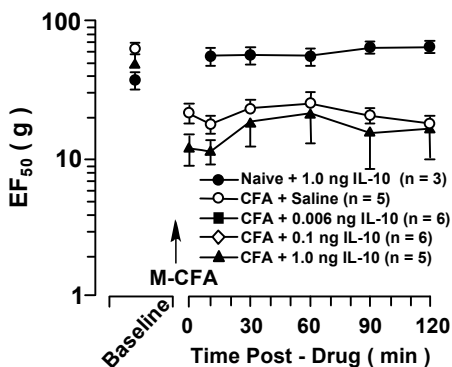

Supplement: MOESM3 [file 9612902]
